# Supplementary material for: PRMT-1 and p120-Catenin as EMT Mediators in Osimertinib Resistance in NSCLC
Source: MDPI journal article supplement (doi:10.3390/cancers15133461), 2023-07-01

## Supplementary Materials

**TABLE S1. DEMOGRAPHICS FOR SMOKERS, QUIT SMOKERS AND NON-SMOKERS FROM WHOM NSCLC TUMOR TISSUES WERE USED FOR STUDY OF PRMT-1/p120-CATENIN EXPRESSION.** Demographics for the 22 quit smokers, 20 smokers, and 21 non-smokers from whom NSCLC Tumor Tissues were used for the study of PRMT-1, and p120-catenin expression. The demographic table shows the sex, race and age of the patients chosen in the study. They all were Caucasian and African Americans and ranged in age from 40 to 80 years old. The de-identified tumor sections used for this study have been taken from lung cancer patients prior to any treatment.

| Type         | Sex  |        | Race      |                  | Age             |                 |                    |
|--------------|------|--------|-----------|------------------|-----------------|-----------------|--------------------|
|              | Male | Female | Caucasian | African American | 40-59 years old | 60-79 years old | Above 80 years old |
| Quit Smokers | 9    | 13     | 21        | 1                | 5               | 16              | 1                  |
| Smokers      | 11   | 9      | 20        | 0                | 5               | 3               | 2                  |
| Non-smokers  | 7    | 14     | 19        | 2                | 4               | 16              | 1                  |

**TABLE S2. HIGH AND LOW EXPRESSION OF p120-CATENIN AND THE SMOKING STATUS OF NSCLC PATIENTS.** Analysis was performed for high and low expression of p120-catenin with the smoking status of NSCLC patients. Statistical analysis was performed using Fisher's exact Test for p120-catenin expression and smoking status of the patients. The p-value was calculated using the Fisher's exact Test with  $p < 0.05$  as the significance value.

| p120-catenin Expression | Smoking status of NSCLC Patients |             |            |
|-------------------------|----------------------------------|-------------|------------|
|                         | Frequency                        |             |            |
|                         | Smoker                           | Quit Smoker | Non-Smoker |
| High Expression         | 6                                | 0           | 1          |
| Low Expression          | 12                               | 21          | 17         |
| p-value                 | 0.002                            |             |            |

**TABLE S3. HIGH AND LOW EXPRESSION OF PRMT-1 AND THE SMOKING STATUS OF NSCLC PATIENTS.** Analysis was performed for high and low expression of PRMT-1 with the smoking status of NSCLC patients. Statistical analysis was performed using Fisher's exact Test for PRMT-1 expression and smoking status of the patients. The p-value was calculated using the Fisher's exact Test with  $p < 0.05$  as significant value.

| PRMT-1 Expression | Smoking status of NSCLC Patients |             |            |
|-------------------|----------------------------------|-------------|------------|
|                   | Frequency                        |             |            |
|                   | Smoker                           | Quit Smoker | Non-Smoker |
| High Expression   | 9                                | 8           | 10         |
| Low Expression    | 9                                | 14          | 10         |
| p-value           | 0.679                            |             |            |

**TABLE S4: REPLICATES OF H358OR WESTERN BLOT.** Replicates of Western Blot experiments comparing fold change of EMT-related proteins in H358 parental cells to H358OR (Osimertinib Resistant). Statistical analysis was performed using 2 tailed t-test with  $p<0.05$  as significant value.

| E-cadherin | Kaiso factor | Vimentin | p120-catenin |
|------------|--------------|----------|--------------|
| -3.03734   | 7.538606     | 24.15785 | 13.42666     |
| -1.42153   | 13.96234     | 45.75979 | 13.28758     |
| -1.50638   | 13.53779     | 37.71268 | 10.67878     |
| -1.16486   | 17.70285083  | 26.80926 | 18.14814     |

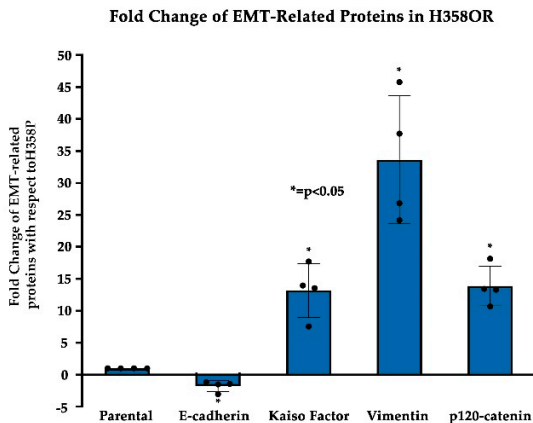

**TABLE S5: REPLICATES OF H1975OR WESTERN BLOT.** Replicates of Western Blot experiments comparing fold change of EMT-related proteins in H1975 parental cells to H1975OR (Osimertinib Resistant). Statistical analysis was performed using 2 tailed t-test with  $p<0.05$  as significant value.

| E-cadherin | Kaiso factor | Vimentin | p120-catenin |
|------------|--------------|----------|--------------|
| -1.65236   | 4.255447     | 20.69061 | 1.490924     |
| -1.44801   | 5.814773     | 41.98547 | 2.168197     |
| -0.99142   | 4.563008     | 73.24499 | 2.163952     |
| -0.937100  | 2.828507     | 55.02873 | 1.272287     |

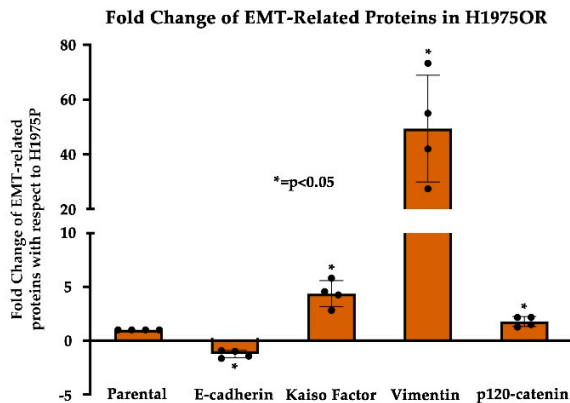

**TABLE S6. REPLICATES OF MTT ASSAY AFTER p120-CATENIN siRNA KNOCKDOWN.** Replicates of MTT assay were performed on H358OR cells after siRNA mediated knockdown of p120-catenin. Statistical analysis was performed using 2-tailed t-test to compare the combination treatment (p120siRNA and Osimertinib) with mock and with mock in combination with Osimertinib. The p-value was calculated using  $p < 0.05$  as significant value.

| Mock | Mock+OR  | p120 siRNA  | p120si RNA+OR |
|------|----------|-------------|---------------|
| 100  | 89.28287 | 86.4940239  | 30.87649      |
| 100  | 89.28287 | 96.29482072 | 64.50199      |
| 100  | 83.78486 | 95.17928287 | 30.95618      |

**Relative Cell Viability in H358OR after siRNA mediated knockdown of p120-catenin as determined by MTT cell viability assay**

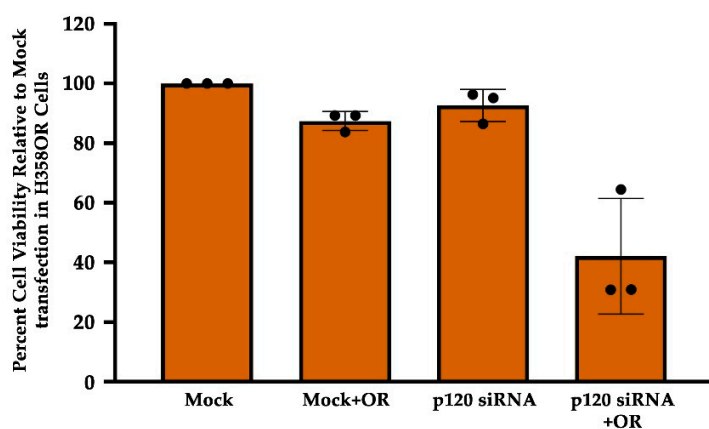

Supplement: s1 [file s1]
