# Supplementary material for: PRMT-1 and p120-Catenin as EMT Mediators in Osimertinib Resistance in NSCLC
Source: MDPI journal article supplement (doi:10.3390/cancers15133461), 2023-07-01
Supplement: s1 [file s1]

WESTERN BLOTS FOR FIGURE 2. Blue arrow indicates known approximate protein molecular weight.

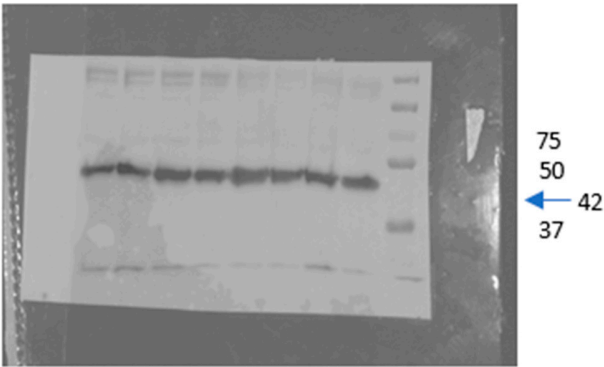

H1975OR  $\beta$ -actin

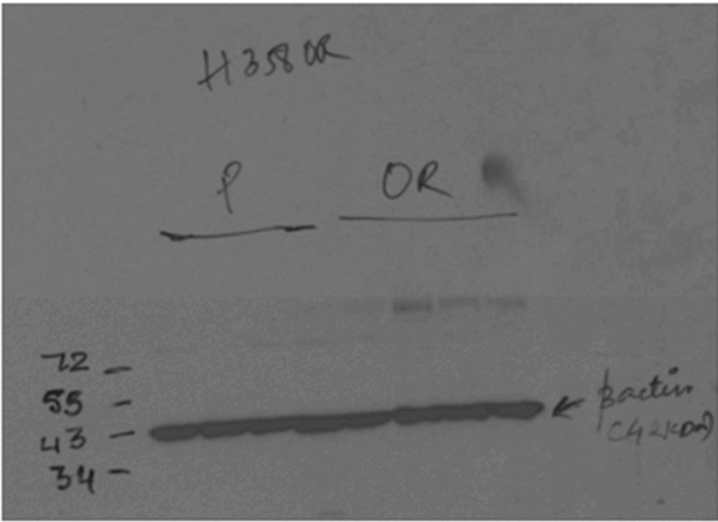

H358OR  $\beta$ -actin

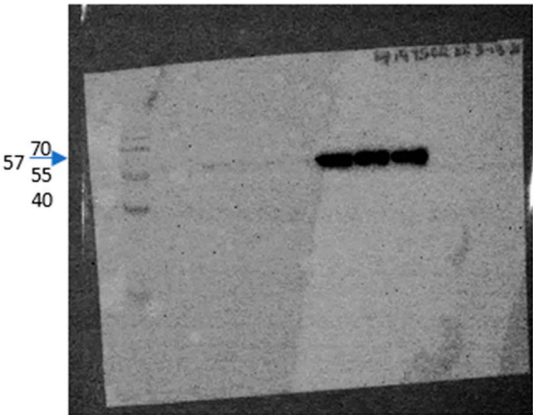

H1975OR Vimentin

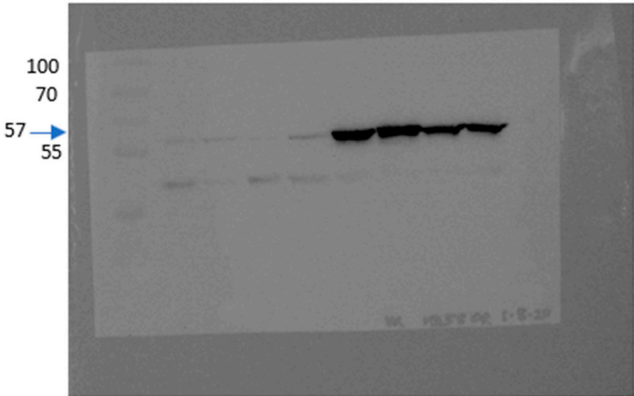

H358OR Vimentin

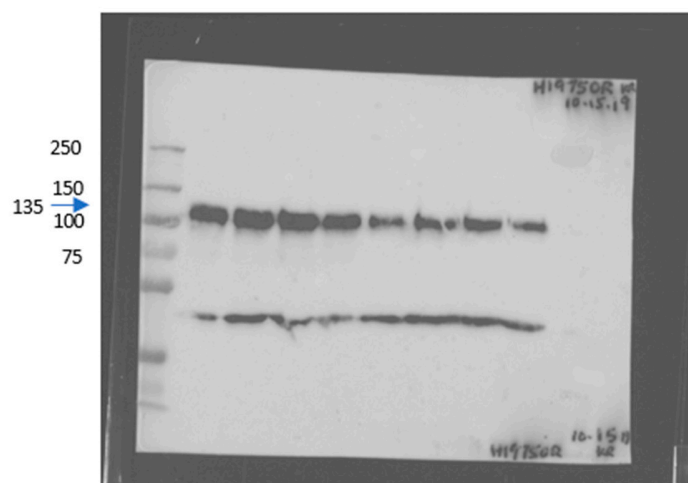

H1975OR E-cadherin

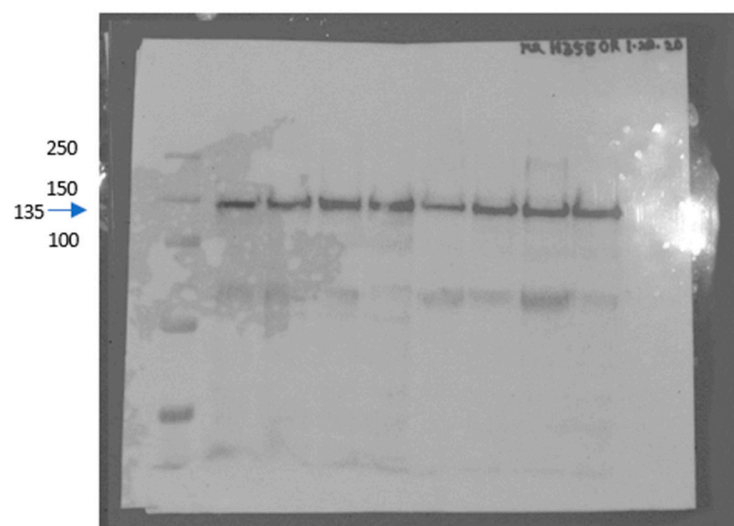

H358OR E-cadherin

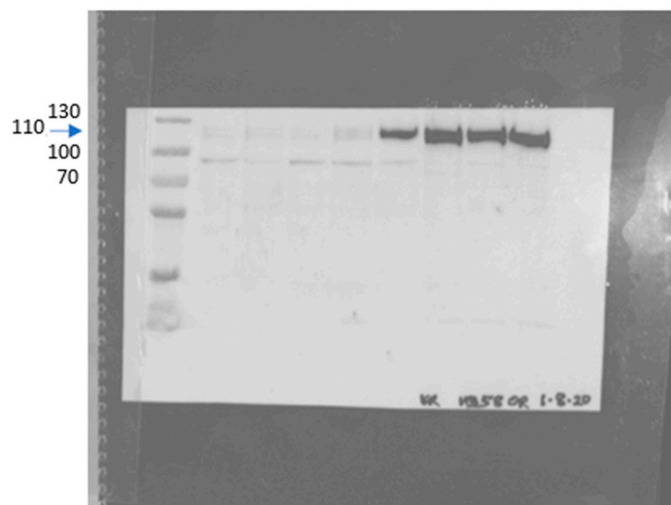

H358OR p120-catenin

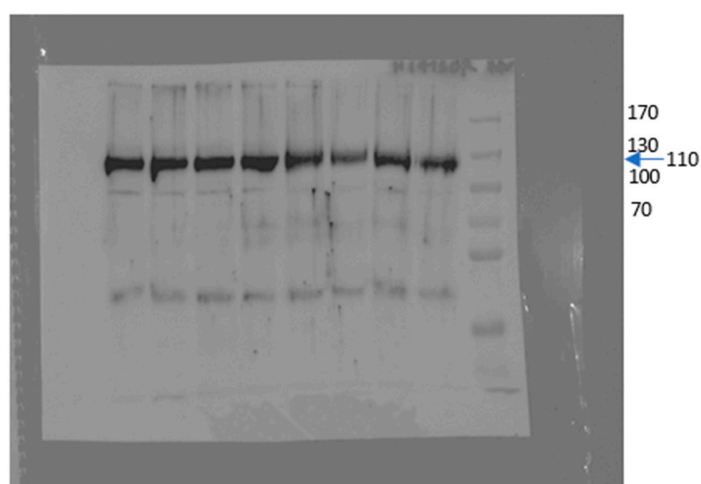

H1975OR p120-catenin

130  
100  
95 →

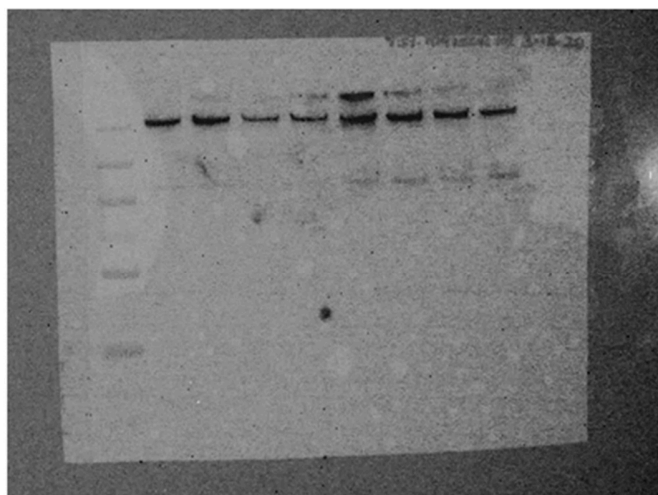

H1975OR Kaiso Factor

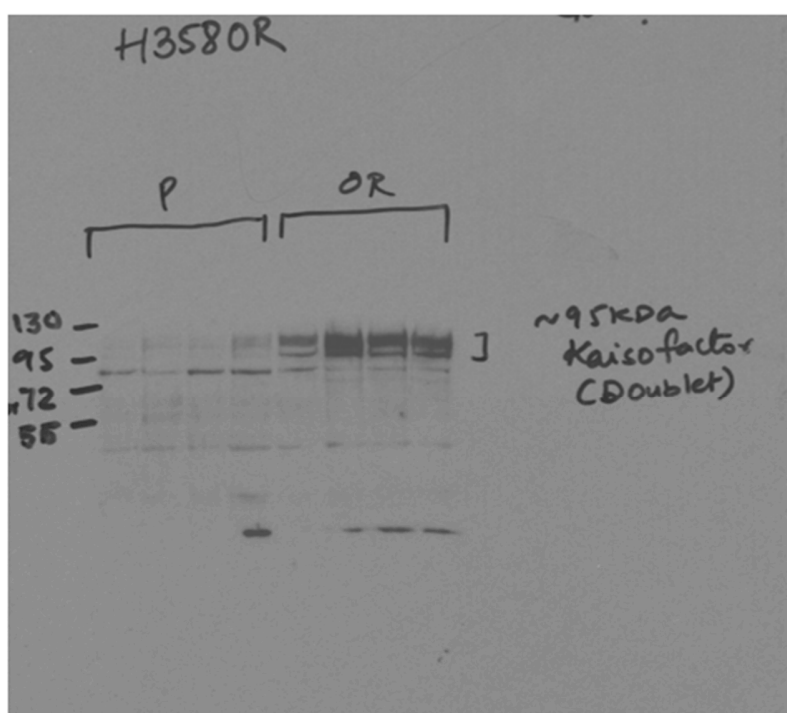

H358OR Kaiso Factor

WESTERN BLOTS FOR FIGURE 5. Blue arrow indicates known approximate protein molecular weight.

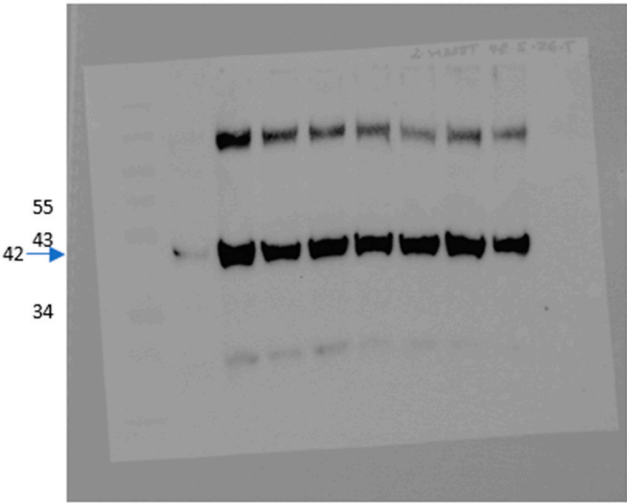

$\beta$ -actin

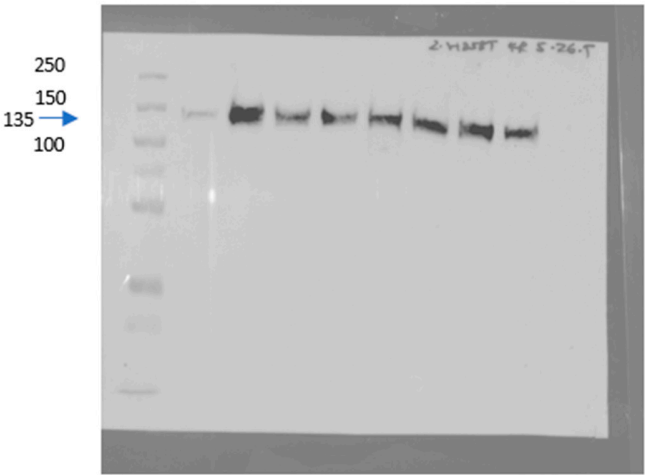

E-cadherin

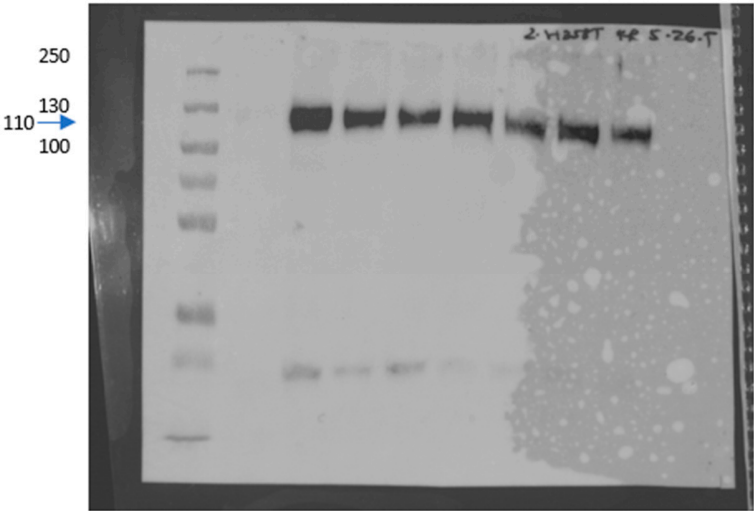

p120-catenin
